# Supplementary material for: A compact X-ray source via fast microparticle streams
Source: PubMed Central journal article supplement (PMC11568210; doi:10.1038/s44172-024-00323-z), 2024-11-15
Supplement: 44172_2024_323_MOESM2_ESM.pdf [file 44172_2024_323_MOESM2_ESM.pdf]

## 1 Supplementary Information

### 2 Supplementary Discussion: Müller–Oosterkamp surface heating model

3 The performance of state-of-the-art rotating anode tubes is limited by focal track erosion. The  
 4 Müller–Oosterkamp theory is typically employed in order to specify the input power of rotating  
 5 anode tubes for different focal spot sizes<sup>37</sup>. It leads to a simple maximum temperature rise  
 6 expression that reads  $\Delta T_M = 2(q_0/k) \sqrt{[(\alpha_d \cdot W)/(\pi v)]}$ , where  $k$  is the thermal conductivity,  $\alpha_d$  the  
 7 thermal diffusivity,  $v$  the local anode velocity and  $q_0$  the incident heat flux. If the focal spot  
 8 width  $W$  is proportional to its length, as typical for medical imaging, this ultimately translates  
 9 to the proportionality of the permitted input power  $P \propto W^{3/2}$ . There are several approximations  
 10 behind the Müller–Oosterkamp theory which are necessary to convert the exact numerical heat  
 11 transfer problem to an analytically solvable two-dimensional boundary value problem. The  
 12 most critical approximation is the surface heating assumption, which can be violated for narrow  
 13 focal spots and high tube voltages<sup>38</sup>, e. g. for diagnostic magnification radiography with focal  
 14 spots smaller than 0.2 mm<sup>38</sup>. In fact, at high electron energies, the characteristic depth of  
 15 electron penetration is no longer much smaller than the focal spot dimensions, which implies  
 16 that volumetric heating should be considered. Thus, the Fourier heat flux surface boundary  
 17 condition now becomes trivial, and a volumetric heat source term should be added to the heat  
 18 conduction equation. Whitaker acknowledged the necessity for volumetric heating and  
 19 introduced the reasonable assumptions that are needed to set-up an analytically solvable two-  
 20 dimensional boundary value problem<sup>30</sup>. The most critical approximation is the oversimplifying  
 21 assumption that the volumetric heating can be approximated by an exponential decay with  
 22 respect to the depth. This leads to an analytical solution with the aid of Laplace transforms and  
 23 to a closed-form expression for the maximum temperature rise  $\Delta T_w$ . Ultimately, Whitaker  
 24 derived a tube voltage dependent power correction factor  $A = \Delta T_w/\Delta T_M$ , based on the additional  
 25 assumption that, during the residence of the electron beam, a maximum temperature rise in the  
 26 focal spot would be permitted that is independent of the tube voltage. However, this assumption  
 27 is not adequate from a thermal fatigue perspective. The mechanisms of tungsten cracking and  
 28 track erosion will change with the location and extension of the heated zone within the  
 29 target<sup>39,40</sup>. Hence, they are expected to depend on the tube voltage. The vendors of diagnostic  
 30 X-ray tubes do not publish voltage dependent power data that are typically validated in life  
 31 cycle tests.

- 32  
 33 37. Müller, A. A “spinning target X-ray generator” and its input limit. *Proc. Roy. Soc. A*  
 34 125, 507 (1929). <https://doi.org/10.1098/rspa.1929.0181>  
 35 38. Dietz, K. A Rotating-Anode X-Ray Tube with Microfocus. *Röntgenstrahler, Siemens*  
 36 *AG, Erlangen, Germany* 6, 1–10 (1982). Remark: It is unclear if the focal spot width  
 37 of 0.2 mm discussed in the paper denotes real or standardized nominal dimensions  
 38 according to the medical standard IEC 60336<sup>16</sup>. The nominal dimension for a real 0.2  
 39 mm wide focal spot using standardized limits of 15 % intensity of the line-spread  
 40 function would be 0.15.  
 41 39. Hirai, T., Pintsuk, G., Linke, J., Batilliot, M. Cracking failure study of ITER-reference  
 42 tungsten grade under single pulse thermal shock loads at elevated temperatures. *J.*  
 43 *Nucl. Mater.* 390391, 751 (2009). <https://doi.org/10.1016/j.jnucmat.2009.01.313>  
 44 40. Rieth, M., Dudarev, S. L., Gonzalez de Vicente, S. M., Aktaa, J., Ahlgren, T.,  
 45 Antusch, S., Armstrong, D. E. J., Balden, M., Baluc, N., Barthe, M.-F., Basuki, W.  
 46 W., Battabyal, M., Becquart, C. S., Blagoeva, D., Boldyryeva, H., Brinkmann, J.,  
 47 Celino, M., Ciupinski, L., Correia, J. B., De Backer, A., Domain, C., Gaganidze, E.,  
 48 Garcia-Rosales, C., Gibson, J., Gilbert, M. R., Giusepponi, S., Gludovatz, B., Greuner,  
 49 H., Heinola, K., Hörschen, T., Hoffmann, A., Holstein, N., Koch, F., Krauss, W., Li,  
 50 H., Lindig, S., Linke, J., Linsmeier, Ch., López-Ruiz, P., Maier, H., Matejicek, J.,

51 Mishra, T. P., Muhammed, M., Muñoz, A., Muzyk, M., Nordlund, K., Nguyen-Manh,  
52 D., Opschoor, J., Ordás, N., Palacios, T., Pintsuk, G., Pippin, R., Reiser, J., Riesch, J.,  
53 Roberts, S. G., Romaner, L., Rosiński, M., Sanchez, M., Schulmeyer, W., Traxler, H.,  
54 Ureña, A., van der Laan, J. G., Veleva, L., Wahlberg, S., Walter, M., Weber, T.,  
55 Weitkamp, T., Wurster, S., Yar, M. A., You, J. H., Zivelonghi, A. Recent progress in  
56 research on tungsten materials for nuclear fusion applications in Europe. *J. Nucl.*  
57 *Mater.* 432, 482 (2013). <https://doi.org/10.1016/j.jnucmat.2012.08.018>

58 **Supplementary Notes: Maximal target input power for tungsten**

59 The mass heat capacity  $c_W(T)$  of tungsten rises substantially with temperature, notably close to  
 60 the melting point  $T_{m,W}$ <sup>33</sup>. Unlike compact targets that would unacceptably erode, microparticle  
 61 targets may be operated in this regime. When the temperature  $T$  of microparticles rises from  $T_0$   
 62 upstream of the interaction region to  $T_{m,W}$  at the exit after their residence time  $\Delta t$ , the maximal  
 63 permitted areal target input energy density  $p_{\max}$  is

$$p_{\max} = \frac{\rho_W}{\Delta t \cdot \zeta_W(E_e, d_{\text{peak}})} \left[ \int_{T_0}^{T_{m,W}} c_W(T) dT + c_{\text{fusion}} \right].$$

64 The temperature dependence of the mass density  $\rho_W$  shall be ignored in this context, as it is  
 65 below 5% in the range from ambient to the melting point.  $\int_{T_0}^{T_{m,W}} c_W(T) dT$  is numerically  
 66 evaluated based on Fig. 5b of ref.<sup>33</sup>.  $\zeta_W(E_e, d_{\text{peak}})$  is evaluated by Monte Carlo simulation<sup>32</sup>,  
 67 Extended Data Fig. 2a.

68 Compared with increasing the temperature from 100 °C to the melting point, phase change by  
 69 melting would add up to 48 % mass heat of fusion  $c_{\text{fusion}}$  to the heat capacity. Melting might be  
 70 permitted for non-aggregating dilute targets if a long tube geometry would allow microparticles  
 71 to re-solidify by in-flight heat radiation cooling before hitting a stopping device.

72 A reduced macroscopic atom density in a microparticle stream causes a reduced macroscopic  
 73 mass density  $\rho_{\mu P}$  such that  $\rho_{\mu P}/\rho_W$  cancels out from the above expression for  $p_{\max}$ . Maximal  
 74 stopping power is found at the depth  $d_{\text{peak}} \cdot \rho_W / \rho_{\mu P}$ . With the length of the electron beam cross  
 75 section  $L_{\text{CS}}$ , its width  $W_{\text{CS}}$ , and the microparticle velocity  $v_{\mu P}$ ,  $\Delta t$  amounts to  $W_{\text{CS}} / v_{\mu P}$ . The input  
 76 power is  $P_{\text{input}} = U_{\text{tube}} \cdot I_{\text{input}} = W_{\text{CS}} \cdot L_{\text{CS}} \cdot p_{\max}$ , whereby  $I_{\text{input}}$  is the primary input electron current  
 77 and  $U_{\text{tube}}$  the tube voltage, is then

$$P_{\text{input}} = \frac{\rho_W \cdot L_{\text{CS}} \cdot v_{\mu P}}{\zeta_W(E_e, d_{\text{peak}})} \left[ \int_{T_0}^{T_{m,W}} c_W(T) dT + c_{\text{fusion}} \right].$$

78

## 79 Supplementary Methods 1: Required Target Density and Derating Factors

80 An electron beam impinging on a standard compact target defines line spread functions (LSF)  
 81 of X-ray intensity along axes normal to the central X-ray beam. As usual, this beam may be  
 82 skewed with respect to the target surface by the target angle,  $\alpha$ . The line spread function in the  
 83 length direction  $LSF_L$  is determined in an evaluation plane that comprises the central X-ray  
 84 beam and the central line of the electron beam. The  $LSF_L$  is measured with a line camera and  
 85 represents the incident X-ray intensity measured along all lines parallel to the central X-ray  
 86 beam, and integrated normal to the plane. The line spread function in the width direction  $LSF_W$   
 87 is evaluated in a similar way, but oriented orthogonal to the length direction. According to the  
 88 medical imaging standard<sup>16</sup>, the dimensions of the focal spot are the distances between the  
 89 abscissa values where  $LSF_L$  and  $LSF_W$  undercut 15% of their respective peak values. In the  
 90 typical case of compact targets and isotropic electron current densities, where electron  
 91 scattering can be ignored, this simply projects the electron beam current density in the cross  
 92 section with the target to a plane normal to the central beam. While the intensity distribution  
 93 along the width is directly mapped, the cross-sectional focal spot length  $L_{CS}$  seemingly shrinks  
 94 to the X-ray optical focal spot length  $L = L_{CS} \cdot \tan(\alpha)$ .

95  
 96 In contrast to compact targets, the mass density reduction in microparticle targets may yield  
 97 large electron scattering ranges and radiation "coronae" reaching to a substantial distance from  
 98 the impact cross section of the primary electron beam. Apertures, that might be positioned  
 99 proximal to the interaction region to eliminate radiation from coronae, would be subject to  
 100 excessive electron impact and are not practical. Furthermore, the X-ray conversion efficiency  
 101 would suffer. The only practical course of action for the realization of the desired focal spot  
 102 dimensions consists in reducing the cross section of the primary electron beam to accommodate  
 103 margins for X-ray coronae within the desired focal spot. Length and width must be treated  
 104 separately. At small target angles, the X-ray corona along the depth axis nearly directly  
 105 increases the focal spot length. Due to the projection, lateral electron scattering in the length  
 106 direction has a smaller impact on the  $LSF_L$ , while a corona in the width direction  
 107 straightforwardly widens the  $LSF_W$ . Supplementary Methods Fig. 1a and b allow an assessment  
 108 of the upper limits for filtration dependent X-ray coronae that will, in practical cases, be of the  
 109 order of 60 – 75% of the stopping power coronae, as shown in Extended Data Fig. 2b.

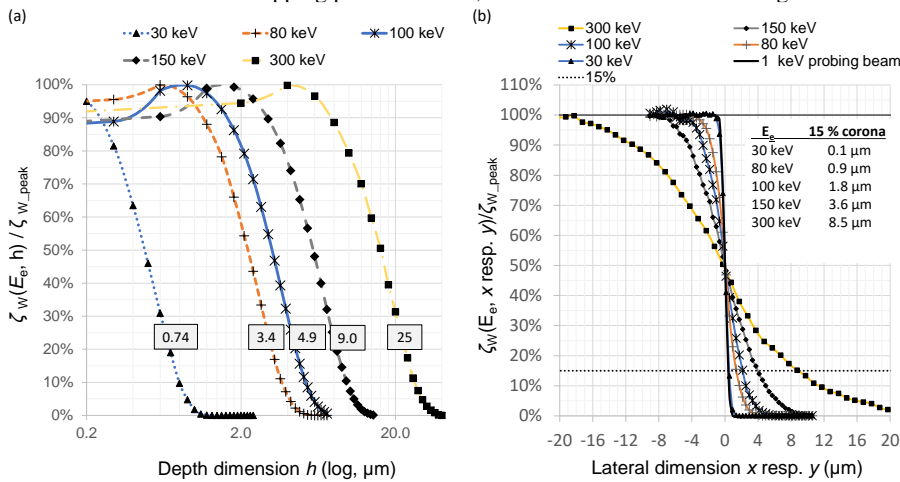

110  
 111 **Supplementary Methods Figure 1** Scattering margins and X-ray coronae. (a) The results of CASINO Monte Carlo simulations  
 112 for the stopping power functions  $\zeta_w(E_e, h)$  of compact tungsten at selected primary electron energies  $E_e$  in the range of 30 – 300

113 keV. The stopping power functions are all normalized over their respective incident energy dependent maxima. The depth axis  
 114  $h$  is logarithmic. The depth corona limits  $d_{15}$ , i.e., the loci where the stopping power functions attain 15% of their maximum,  
 115 are designated in the boxes:  $10^5$  primary events for 30 and 300 keV,  $10^6$  for 80 and 150 keV,  $5 \times 10^6$  for 100 keV. (b) The results  
 116 of CASINO simulations for the lateral electron scattering at an edge (at  $x = 0$ ) of a semi-infinite electron beam at selected  
 117 primary electron energies in the range of 30 – 300 keV. The lateral X-ray corona margins  $l_{15}$ , i.e., the loci where the functions  
 118 attain 15% of the maximum, are listed inside the table to the right. A 1 keV probing beam was utilized in the simulation to  
 119 characterize the nearly rectangular electron beam current density.

120 Supplementary Methods Fig. 1(a) assesses the upper limits of coronae  $d_{15}$  in the depth direction,  
 121 as derived from the stopping power function, while Supplementary Notes Fig. 1 (b) quantifies  
 122 the lateral scattering. The region at the edge of a simulated electron beam with a sharp edge is  
 123 depleted from electrons, whereas the external region is populated. For the quantitative analysis,  
 124 the simulated stopping power per voxel has been summed over the depth direction and then  
 125 projected to the target surface. Under the reasonable assumption that the stopping power can  
 126 represent the X-ray intensity also for this lateral case, at all incident electron energies, the lateral  
 127 X-ray corona is assessed by measuring from the edge of the electron beam (set to  $x = 0$ ) up to  
 128 the point where the projected stopping power undercuts the 15% line of the respective value in  
 129 the centre of a large focal spot (100% intensity). CASINO requires a circular electron beam  
 130 cross section. To minimize the errors, only a small rectangular target area with a non-vanishing  
 131 tangential extension reaching into this beam was evaluated. A probing beam of 1 keV electron  
 132 energy with an assumed infinitely small scattering spread (“stopping power corona”) was  
 133 simulated with the same geometry aiming to delineate the simulation specific uncertainties and  
 134 the location of the zero point, that was taken at the crossing of the 50% line for each curve. The  
 135 reduction of the electron beams cross section, that may be necessary for the accommodation of  
 136 the combined X-ray coronae, will require the reduction of the permitted power rating of the X-  
 137 ray source. Supplementary Table lists the reduction factors that should be applied to the gain  
 138 factor  $G_{0.3}$  for a sample focal spot of nominal 0.3 and  $8^\circ$  target angle (standard IEC 60336<sup>16</sup>)  
 139 depicted in Fig. 4 of the main article.

140 It is worth emphasizing that the upper limits of the X-ray coronae in the lateral and depth  
 141 directions are adopted from the stopping power function  $\zeta$ . This leads to an overestimation of  
 142 the corona size of the X-ray intensity of the filtered beam that defines the standardized LSFs.  
 143 Strong filtration, e.g., by the object, will further shorten the line-spread functions. Thus,  
 144 Supplementary Table 1, ignoring any filtration, lists the worst case. It can be discerned that a  
 145 microparticle target density of 10% of the compact tungsten density would still suffice to deliver  
 146 high output. Therefore, it is advised to simultaneously fulfil both, often contradicting,  
 147 requirements: sufficient microparticle powder supply and high velocity. A target density of 1%  
 148 and smaller may result in excessive coronae for 150 kV and 300 kV tube voltages. Thus, such  
 149 cases are represented by zero percent in the table.

Formatted: Font: Not Italic

Formatted: Font: Not Italic

150 **Supplementary Methods 2: The SPEKPY V2 toolkit and X-ray Intensity Depth Curves**

151 SpekPy V2 is a validated software toolkit that models X-ray spectra and carries out spectrum-  
 152 related postprocessing. It includes the most advanced physics models available in similar  
 153 purpose software<sup>34</sup>. The top-level spectral models are elaborated in ref.<sup>41</sup> and have been  
 154 validated in refs.<sup>34,42</sup>, while the underlying physics models are evaluated in refs.<sup>43,44</sup>. In brief,  
 155 the depth resolved electron frequency distributions in solid target materials (differential in  
 156 energy and direction), that have been pre-computed with the PENELOPE code<sup>45</sup>, serve as the  
 157 input data to SpekPy. Then, the bremsstrahlung fluence at a given emission angle is calculated,  
 158 based on tabulations of the bremsstrahlung cross-section (differential in emission energy) and  
 159 on tabulations of the so-called "shape-function" of the angular distribution of bremsstrahlung  
 160 emission. The characteristic X-ray fluence (L- & K-lines) is generated based on frequency depth  
 161 distributions that are again pre-computed with PENELOPE, including direct (via electron  
 162 impact ionization) and indirect (via bremsstrahlung) sources of atomic relaxation. Both  
 163 bremsstrahlung and characteristic emissions are corrected for the fluence "self-filtration" by the  
 164 target itself, as well as an optional amount of added filtration.

165 An example of X-ray spectrum prediction is shown in Supplementary Methods Fig. 2, together  
 166 with a comparison to measurements made at a National Standards facility<sup>46</sup>. As illustrated in  
 167 the figure, the SpekPy toolkit can provide a fluence spectrum at a given emission direction that  
 168 is integrated over all depths of emission in the target. For the purposes of the current work, the  
 169 Python codebase was modified to allow the extraction of the pre-integrated fluence spectra  
 170 contributions. These could then be converted to intensity spectra and integrated over X-ray  
 171 energy to provide intensity-depth curves for X-ray emissions from solid targets (instead of  
 172 fluence-energy curves). The toolkit options selected for the study concern a tungsten target, an  
 173 8° target angle, the X-ray linear attenuation coefficients of PENELOPE (with the default re-  
 174 normalised photoelectric effect contribution) and the "SIM" shape-function for bremsstrahlung  
 175 emission, i.e., the leading term of the standard 2BN angular distribution<sup>41</sup>. A filtration of 2.5mm  
 176 of Al was applied in addition to the intrinsic self-filtration of the fluence spectra by tungsten.

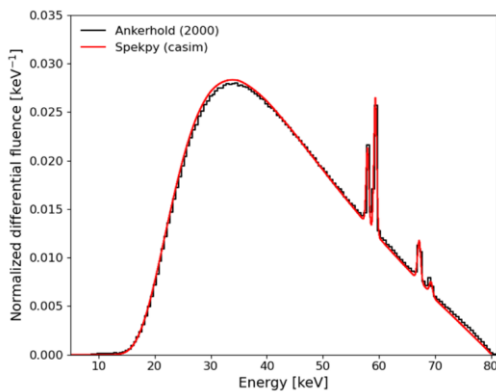

177  
 178 **Supplementary Methods Figure 2** Comparison of the SpekPy V2 predictions (casim option)<sup>34</sup> with the measurements of  
 179 Ankerhold<sup>46</sup> for an RQR6 radiographic spectrum. The areas beneath the curves are normalized to unity. The bin width for the  
 180 SpekPy calculations was 0.1 keV with a Gaussian filter ( $\sigma = 0.25$  keV) applied to represent the detector energy resolution.

181 In the present study, it has been assumed that the X-ray intensity-depth curve from an ensemble  
 182 of microparticles corresponds to the X-ray intensity-depth curve from a solid target (as  
 183 generated from the SpekPy toolkit) that has been re-scaled by the ratio of the average granular

184 medium mass density to the mass density of the compact target. Fig. 5 (b) of the main  
185 manuscript depicts the resulting intensity-depth curve for an incident electron kinetic energy of  
186 100 keV and a compact tungsten target with a 100% packing fraction.

- 187 41. Omar, A., Andreo, P., Poludniowski, G. A model for the energy and angular  
188 distribution of x rays emitted from an x-ray tube. Part I. Bremsstrahlung production.  
189 *Med. Phys.* 47, 4763 (2020). DOI: <https://doi.org/10.1002/mp.14359>
- 190 42. Omar, A., Andreo, P., Poludniowski, G. A model for the energy and angular  
191 distribution of x rays emitted from an x-ray tube. Part II. Validation of x-ray spectra  
192 from 20 to 300 kV. *Med. Phys.* 47, 4005 (2020). <https://doi.org/10.1002/mp.14360>
- 193 43. Omar, A., Andreo, P., Poludniowski, G. Performance of different theories for the  
194 angular distribution of bremsstrahlung produced by keV electrons incident upon a  
195 target. *Radiat. Phys. Chem.* 148, 73 (2018). DOI:  
196 <https://doi.org/10.1016/j.radphyschem.2018.02.009>
- 197 44. Omar, A., Andreo, P., Poludniowski, G. A model for the emission of K and L X-rays  
198 from an X-ray tube. *Nucl. Instrum. Meth. Phys. Res. B* 437, 36 (2018). DOI:  
199 <https://doi.org/10.1016/j.nimb.2018.10.026>
- 200 45. F. Salvat, PENELOPE 2018: Code system for Monte Carlo simulation of electron and  
201 photon transport, (OECD Publishing, Paris, 2019)
- 202 46. U. Ankerhold, PTB Report Dos-34 (Braunschweig, Germany: Physikalisch-  
203 Technische Bundesanstalt; 2000)

### 204 [Supplementary Methods 3: Model settings for the Casino Monte Carlo simulations](#)

205 All Monte Carlo electron transport simulations reported in this study were performed with the  
 206 CASINO 3.3.0.4 software<sup>32,47</sup>. This code is tailor made for the investigation of electron  
 207 backscattering, electron transmission, secondary electron emission and electron dissipation in  
 208 condensed matter at the energy ranges of interest, making it the preferred software for our  
 209 purposes. In CASINO, the total and differential elastic scattering cross-sections are adopted  
 210 from the ELSEPA code<sup>48</sup>, which numerically solves the Dirac equation in a spherically  
 211 symmetric interaction potential that considers the screening of the nuclear field by the  
 212 surrounding electrons. In case of a bare Coulomb interaction, this procedure would yield the  
 213 Mott scattering cross-section. The ELSEPA interaction potential includes an electrostatic term  
 214 with contributions from the nucleus and the surrounding electron density, an exchange term  
 215 within a local approximation, a correlation-polarization term described by a Buckingham  
 216 potential and an imaginary absorption term that describes loss from elastic to inelastic channels.  
 217 In CASINO simulations, a database generated from ELSEPA for input electron energies up to  
 218 500 keV is interpolated. It is also important to note that pre-calculated ELSEPA tables are also  
 219 utilized in the PENELOPE code and the GEANT4 code. In addition, the mean ionization -  
 220 excitation losses are described by a semi-empirical stopping power formula that incorporates  
 221 energy variability into the mean ionization potential<sup>48</sup>. For high electron energies, this formula  
 222 naturally collapses to the standard Bethe expression. For low electron energies, this formula  
 223 avoids the well-known positive stopping power pathology of the Bethe expression and is  
 224 constructed so that the results of multi-shell Bethe versions are accurately reproduced. Finally,  
 225 the generation of internal secondary electrons is treated with a hybrid model for inelastic  
 226 scattering, where fast secondary generation is based on the Møller full QED differential cross-  
 227 section and slow secondary generation is based on linear response theory. The following model  
 228 settings were employed in all simulations reported in this study: (i) Use of room temperature  
 229 mass density. (ii) Secondary electron fine tuning details: Maximum order generated: 10,  
 230 residual energy loss: 0.4 eV. Secondary electron production was always selected to improve  
 231 accuracy. However, emitted secondaries were not included in the backscattering and  
 232 transmission yields. (iii) Minimum energy of simulated electrons equal to the work function.  
 233 (iv) Use of the lagged Fibonacci pseudo-random number generator. (v) New direction cosine  
 234 calculation as in the NIST MONSEL code.

235

### 236 [Supplementary Methods 4: Validation of the Casino Monte Carlo simulation software](#)

237 We benchmarked CASINO 3.3.0.4 predictions against relevant reliable experimental results.  
 238 We used 10<sup>6</sup> primary test events (primary electrons) for each MC simulation and achieved a  
 239 statistical variance smaller than 0.1%, assuming Poisson statistics. Given the spherical  
 240 transparent microparticles of interest, the validation exercise focused on the normal and oblique  
 241 electron backscattering yields of semi-infinite planar targets as well as the normal electron  
 242 backscattering yields and electron transmission yields of transparent films. Since tungsten ( $Z =$   
 243  $74$ ) data were only available for normal electron incidence on bulk planar targets, tantalum ( $Z =$   
 244  $73$ ) and gold ( $Z = 79$ ) were utilized as proxy materials. This is justified by the fact that the  
 245 backscattering and transmission yields mainly depend on the atomic number in the keV electron  
 246 energy range of interest. The CASINO predictions for the normal incidence electron  
 247 backscattering yield of bulk semi-infinite tungsten plates have been compared with the  
 248 experimental results of Hunger and Kuchler<sup>50</sup> in the 4-40 keV energy range (eight data points,  
 249 accessed from tabulations), the measurements of Reimer and Tollkamp<sup>51</sup> in the 3-30 keV energy  
 250 range (six data points, accessed from tabulations in Joy's<sup>49</sup> electron-solid interaction database)  
 251 as well as the experimental results of Heinrich<sup>52</sup> in the 10-49 keV energy range (five data points,  
 252 accessed from tabulations in Joy's<sup>49</sup> electron-solid interaction database). The deviation between  
 253 experiments and simulations is satisfactory in the relevant energy range, see Supplementary  
 254 Methods Fig. 3.

Formatted: Superscript



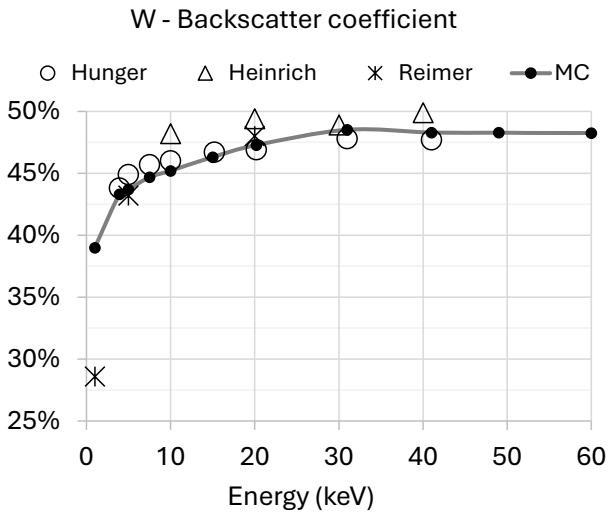

255 **Supplementary Methods Figure 3** Normal incidence electron backscattering yield of bulk tungsten slab experiments. Refs.  
 256 49,51,50 (from left) vs. CASINO 3.3.0.4 (MC, dots, lines added to guide the eye)  
 257

258 The CASINO predictions for the normal and oblique incidence electron backscattering yield of  
 259 bulk tantalum and gold plates were benchmarked against the measurements of Neubert and  
 260 Rogaschewski<sup>53</sup> at 20; 40; 60 keV in the 0-80° incidence range (ten data points per incident  
 261 angle, accessed from tabulations). In the case of gold, the normal incidence experiments of  
 262 Drescher et al.<sup>54</sup> in the 10-100 keV energy range (seven data points, accessed from tabulations)  
 263 have also been included. Considering the experimental uncertainties at near grazing angles as  
 264 well as the fact that these measurements were not carried out in ultra-high vacuum with  
 265 provisions for in-situ surface cleaning<sup>55</sup>, the agreement is judged to be satisfactory. Examples  
 266 are shown in Supplementary Methods Fig. 4 and 5.

### Ta - Backscatter coefficient

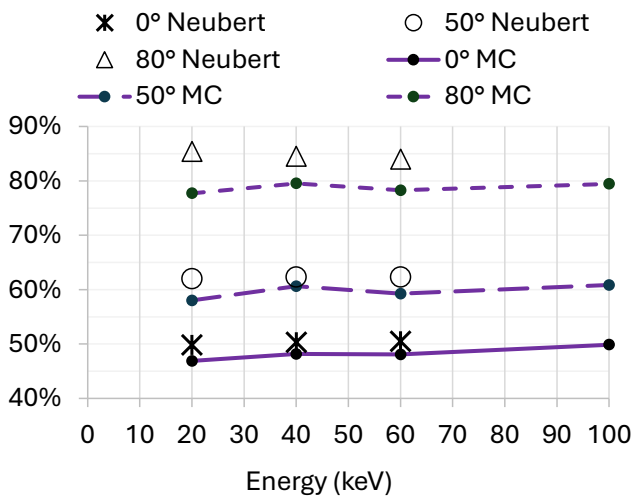

267 **Supplementary Methods Figure 4** Normal and oblique incidence electron backscattering yield of bulk tantalum slabs;  
 268 CASINO (dots, lines added to guide the eye) vs. experiments<sup>53</sup> (lines added to guide the eye)  
 269

270 The CASINO predictions for the normal incidence electron backscattering yield and electron  
 271 transmission yield of transparent gold films have been benchmarked against the measurements  
 272 of Reimer and Drescher<sup>56</sup> for 10-500 nm foil thickness in the 10-100 keV energy range. The  
 273 data were extracted with the aid of software and were offset-corrected by linearly extrapolating  
 274 to the limit of zero foil thickness, where the backscattering yield is 0% and the transmission  
 275 yield is 100%. The CASINO simulations featured a 1 nm wide incident electron beam normal  
 276 on a cylindric gold slab of varying thickness with a model radius of 100  $\mu\text{m}$  that was chosen  
 277 much larger than that the CSDA (continuous slowing down approximation) range for 300 keV  
 278 electrons in gold, to minimize errors from electron diffusion at the slab edges.

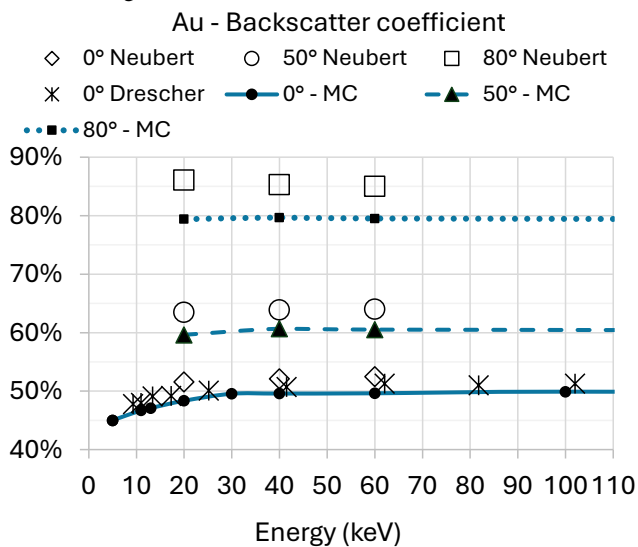

279 **Supplementary Methods Figure 5** Normal & oblique incidence electron backscattering yield of bulk gold slabs; CASINO  
 280 (MC, dots, lines added to guide the eye) vs. experiments, refs.<sup>53,54</sup>  
 281

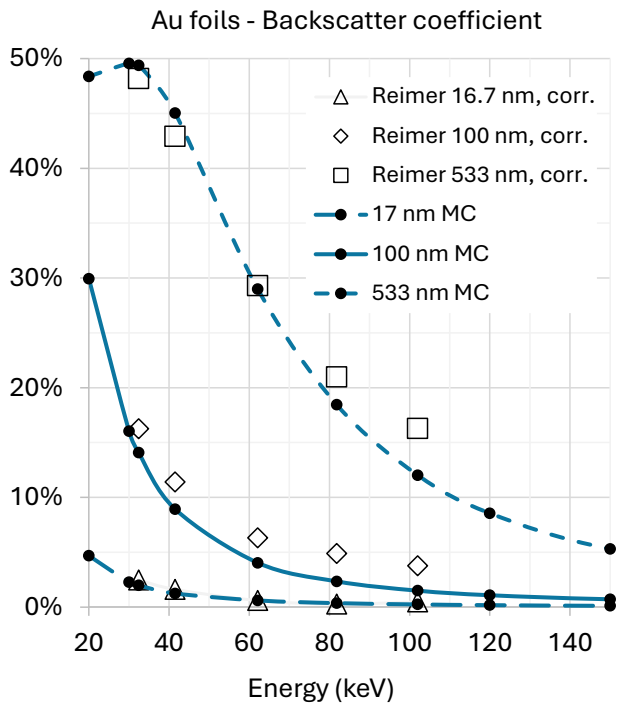

282  
 283 **Supplementary Methods Figure 6** Normal incidence electron backscattering yield of transparent gold foils; CASINO (dots,  
 284 lines added to guide the eye) vs. experiments<sup>56</sup>

285  
 286 The CASINO simulations can satisfactorily reproduce both the backscattering and the  
 287 transmission yields regardless of the film thickness and the incident electron energy, see  
 288 Supplementary Methods Fig. 6 and 7. An Excel file with the source data for Supplementary  
 289 Methods Fig. 3–7 is provided. Therein, the procedure for the offset correction of the  
 290 experimental data for the transparent film backscattering and transmission yields is described  
 291 in further detail.  
 292

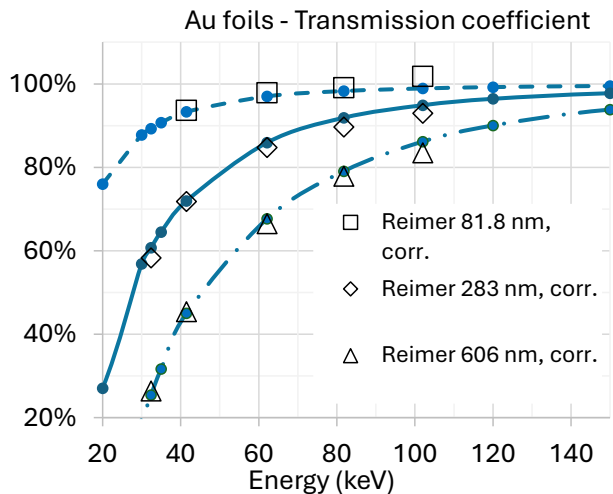

Supplementary Methods Figure 7 Normal incidence electron transmission yield of transparent gold foils; CASINO (MC, dots, lines added to guide the eye) vs. experiments<sup>56</sup>

- 293  
294  
295  
296  
297
47. Hovington, P., D. Drouin, D., Gauvin, R., CASINO: A new Monte Carlo code in C language for electron beam interaction—Part I: Description of the program. *Scanning* 19, 1 (1997). DOI: <https://doi.org/10.1002/sca.4950190101>
48. Salvat, F., Jablonski, A., C. J. Powell, C.J. Elsepa—Dirac partial-wave calculation of elastic scattering of electrons and positrons by atoms, positive ions and molecules (New Version Announcement. *Comput. Phys. Commun.* 165, 157 (2005). DOI: <https://doi.org/10.1016/j.cpc.2020.107704>
49. Joy, D. C. & Luo, S. An empirical stopping power relationship for low-energy electrons. *Scanning* 11, 176–180 (1989). <https://doi.org/10.1002/sca.4950110404>
50. Hunger, H.-J. & Küchler, L. Measurements of the electron backscattering coefficient for quantitative EPMA in the energy range of 4 to 40 keV. *Physica Status Solidi (a)* 56, K45–K48 (1979). <https://doi.org/10.1002/pssa.2210560157>
51. Reimer, L. & Tollkamp, C. Measuring the backscattering coefficient and secondary electron yield inside a scanning electron microscope. *Scanning* 3, 35–39 (1980). <https://doi.org/10.1002/sca.4950030105>
52. Heinrich, Kurt. F. J. Electron probe microanalysis by specimen current measurement, cited after D. C. Joy: A database of electron-solid interactions, revision #08-1, April 2008, *Scanning* 17, p. 270-275 (1995). in *4th Cong. Int. sur l'Optique des Rayons X et Microanalyse* (eds. Castaing, R., Deschamps, P. & Philibert, J.) 159 (Herman, 1966).
53. Neubert, G. & Rogaschewski, S. Backscattering coefficient measurements of 15 to 60 keV electrons for solids at various angles of incidence. *Phys. Stat. Sol. (a)* 59, 35–41 (1980). DOI: <https://doi.org/10.1002/pssa.2210590104>
54. Drescher, H., Reimer, L., Seidel, H. Rückstreuoeffizient und Sekundärelektronen-Ausbeute von 10–100 keV-Elektronen und Beziehungen zur Raster-Elektronenmikroskopie. *Z. Angew. Physik* 29, 331 (1970)
55. Tolia, P. On secondary electron emission and its semi-empirical description. *Plasma Phys. Control. Fusion* 56, 123002 (2014). DOI: <https://doi.org/10.1088/0741-3335/56/12/123002>
- 310  
311  
312  
313  
314  
315  
316  
317  
318  
319  
320  
321  
322  
323  
324  
325

Field Code Changed

Field Code Changed

- 326 56. Reimer, L. & Drescher, H. Secondary electron emission of 10-100 keV electrons from  
327 transparent films of Al and Au. *J. Phys. D: Appl. Phys* 10, 805–815 (1977). DOI:  
328 <https://doi.org/10.1088/0022-3727/10/5/022>

329 **Supplementary Table**

330 **Supplementary Notes Table 1** Worst-case reduction factors to be applied to the power ratings for the given tungsten mass  
331 densities. The reduction factors accommodate for X-ray coroneae from electron scattering. They naturally depend on the tube  
332 voltage and the microparticle stream density. A sample focal spot 0.3 with 8° target angle is assumed (nominal according to  
333 the standard IEC 60336<sup>16</sup>).

| Tube voltage (kV) | 100% (compact) | 74% (close packing) | 10%  | 1%   | 0.1% |
|-------------------|----------------|---------------------|------|------|------|
| 30                | 1              | 1                   | 0.99 | 0.88 | 0    |
| 80                | 1              | 1                   | 0.95 | 0.45 | 0    |
| 100               | 1              | 1                   | 0.93 | 0.19 | 0    |
| 150               | 1              | 1                   | 0.87 | 0    | 0    |
| 300               | 1              | 1                   | 0.62 | 0    | 0    |

334
